# Supplementary material for: Optimal concentration of ropivacaine for peripheral nerve blocks in adult patients: a protocol for systematic review and meta-analysis
Source: HighWire-hosted journal article supplement (doi:10.1136/bmjopen-2023-077876), 2023-12-01
Supplement: bmjopen-2023-077876supp001_data_supplement.pdf [file bmjopen-2023-077876supp001_data_supplement.pdf]

## Search strategies

### EMBASE

#1 'Ropivacaine'/exp OR 'Ropivacaine':ti,ab,kw  
#2 'Nerve block'/exp OR 'Nerve block':ti,ab,kw OR 'Nerve blockade':ti,ab,kw OR  
'Peripheral nerve block':ti,ab,kw OR 'Peripheral nerve blockade':ti,ab,kw  
#3 'Randomized controlled trial'/exp OR 'Randomized controlled trial':ti,ab,kw OR  
'Controlled clinical trial':ti,ab,kw OR 'Clinical trial':ti,ab,kw OR 'Clinical  
study':ti,ab,kw OR 'Randomized':ti,ab,kw  
#4 #1 AND #2 AND #3

### Cochrane library Trials

#1 MeSH descriptor: (Ropivacaine) explode all trees  
#2 (Ropivacaine):ti,ab,kw  
#3 #1 OR #2  
#4 (Nerve block):ti,ab,kw  
#5 (Nerve blockade):ti,ab,kw  
#6 (Peripheral nerve block):ti,ab,kw  
#7 (Peripheral nerve blockade):ti,ab,kw  
#8 #4 OR #5 OR #6 OR #7  
#9 (Randomized controlled trial):ti,ab,kw  
#10 (Controlled clinical trial):ti,ab,kw  
#11 (Clinical trial):ti,ab,kw  
#12 (Clinical study):ti,ab,kw  
#13 (Randomized):ti,ab,kw  
#14 #9 OR #10 OR #11 OR #12 OR #13  
#15 #3 AND #8 AND #14

### Web of science

#1 Ropivacaine (Topic)  
#2 Nerve block (Topic) OR Nerve blockade (Topic) OR Peripheral nerve block (Topic)

OR Peripheral nerve blockade (Topic)

#3 Randomized controlled trial (Topic) OR Controlled clinical trial (Topic) OR

Clinical trial (Topic) OR Clinical study (Topic) OR Randomized (Topic)

#4 #1 AND #2 AND #3
